# Supplementary material for: Suppression of Proliferation of Human Glioblastoma Cells by Combined Phosphodiesterase and Multidrug Resistance-Associated Protein 1 Inhibition
Source: MDPI journal article supplement (doi:10.3390/ijms22189665), 2021-09-07
Supplement: s1 [file s1]

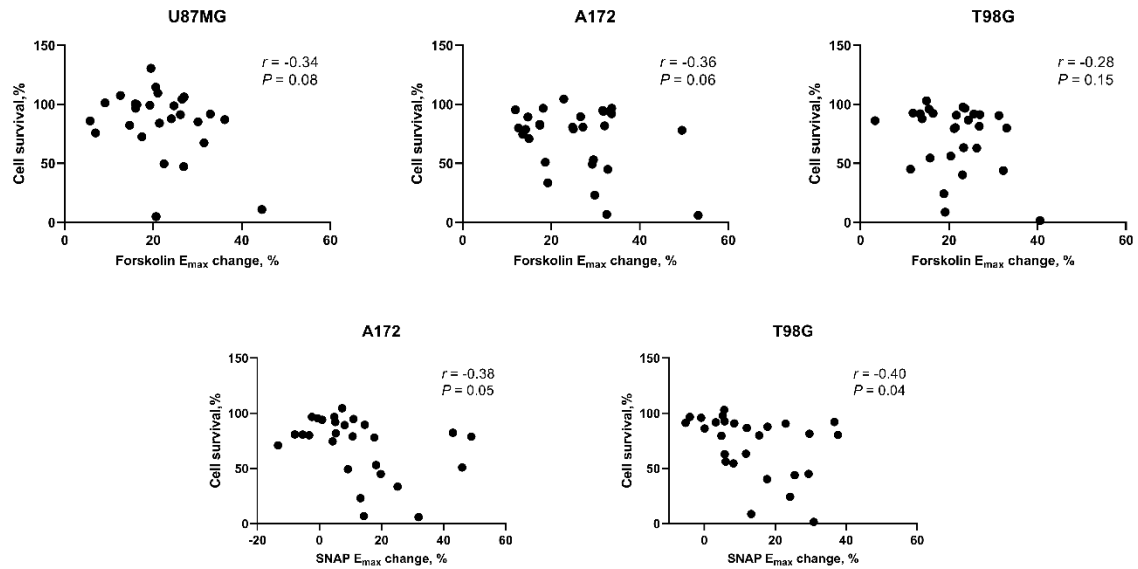

**Supplementary Figure S1. Analysis of the relationships between the degree of elevation of cAMP or cGMP levels and the extent of the antiproliferative effect of PDE inhibitors at a concentration of 100  $\mu$ M in glioblastoma cell lines U87MG, A172 and T98G.** Changes in the level of cAMP and cGMP were inferred from the percentages of the maximum response ( $E_{max}$ ) change in cells after stimulation with forskolin (upper row) and SNAP (lower row), respectively. Each point represents an individual PDE inhibitor tested. Pearson correlation coefficient  $r$  and two-tailed  $p$ -value are indicated.
