# Supplementary material for: Suppression of Proliferation of Human Glioblastoma Cells by Combined Phosphodiesterase and Multidrug Resistance-Associated Protein 1 Inhibition
Source: MDPI journal article supplement (doi:10.3390/ijms22189665), 2021-09-07
Supplement: s1 [file s1]

**Supplementary Table S1. Primers used for PCR.**

| N  | Gene         | Sequence (5' → 3')                                     | Amplicon Size (bp) | PrimerBank or PubMed ID | N  | Gene           | Sequence (5' → 3')                                       | Amplicon Size (bp) | PrimerBank or PubMed ID |
|----|--------------|--------------------------------------------------------|--------------------|-------------------------|----|----------------|----------------------------------------------------------|--------------------|-------------------------|
| 1  | <i>GAPDH</i> | F: TGCACCACCAACTGCTTAGC<br>R: GGCATGGACTGTGGTCATGAG    | 87                 | PMID: 12184808          | 19 | <i>PDE7A</i>   | F: CGTATGCTAGGAGATGTACGTGT<br>R: TGAACCCGACGTACCACGAAA   | 201                | 341823662c1             |
| 2  | <i>PDE1A</i> | F: ATGGGGTCTAGTGCCACAGAG<br>R: GCACAGATGCCGCATATTCAAT  | 187                | 51102298c1              | 20 | <i>PDE7B</i>   | F: GGTTGAGAGGTGTGGCGAAAT<br>R: CCTTAGCTCGTATATCTCCAGCA   | 85                 | 57242789c1              |
| 3  | <i>PDE1B</i> | F: CTGCGCTACATGGTGAAGCA<br>R: CAAGATTTGCCGTGTCTCATCTA  | 123                | 260436978c1             | 21 | <i>PDE8A</i>   | F: TCCAGCCAGAGACGACACT<br>R: ACAGGCATGGGACTACTTTCC       | 116                | 341823697c2             |
| 4  | <i>PDE1C</i> | F: ATAAGACAGGAGTGGCGAACT<br>R: GTATGCTCGTAGTCATGGATGG  | 85                 | 300796870c3             | 22 | <i>PDE8B</i>   | F: ACGCAGGCTTCAACAGGAG<br>R: CGTGGTCATCGCTTGTATTCT       | 177                | 300244576c3             |
| 5  | <i>PDE2A</i> | F: GACCGCAAGATCCTCCAACCTG<br>R: CCGAGCACTTTGTCTCCGA    | 176                | 344925850c2             | 23 | <i>PDE9A</i>   | F: GACTCCTCGACGCGATGTTT<br>R: TTTCTGTAGTTGTCGTGGACG      | 222                | 48762733c1              |
| 6  | <i>PDE3A</i> | F: CCACGGCCTCATTACCGAC<br>R: TTGCTCACGGCTCTCAAGG       | 78                 | 347658968c1             | 24 | <i>PDE10A</i>  | F: GAGACAACCAGCTACTCTCT<br>R: ACAGGCTATTATTGCACTCTCCA    | 105                | 359465520c2             |
| 7  | <i>PDE3B</i> | F: GTGCCGCCGAAGAAAAAGTG<br>R: CAACTGCCATAGTAAGTGGCTG   | 94                 | 219879808c1             | 25 | <i>PDE11A</i>  | F: TGATGACTTTTCTCTCGACGTTG<br>R: AAGCCACTACACAGTGTCTC    | 115                | 116536086c1             |
| 8  | <i>PDE4A</i> | F: ACACACCTGTCAGAAATGAGC<br>R: GGGTGATGGGATCTCCACTTC   | 99                 | 341572546c1             | 26 | <i>PDE12</i>   | F: GTAGTGCGCTGCGTACCTT<br>R: GCGCTGCATGTTCTTGTGG         | 81                 | 189027128c1             |
| 9  | <i>PDE4B</i> | F: AACGCTGGAGGAATTAGACTGG<br>R: GCTCCCGGTTCCAGATTCT    | 110                | 82799485c1              | 27 | <i>GUCY1A2</i> | F: GAGGACTGCTTCGAGATTGTATC<br>R: TGGTTCTAATCACAAACGGGGTA | 91                 | 374093197c3             |
| 10 | <i>PDE4C</i> | F: GAGACGCTAGACGAGCTGGA<br>R: GTGGGTCAACTCCCGGTTT      | 120                | 341604763c2             | 28 | <i>GUCY1A3</i> | F: AGTGAGGAGATGGGACAACCTC<br>R: GAGCCCTCGTCTGTAAAATC     | 148                | 374253805c3             |
| 11 | <i>PDE4D</i> | F: GACCAATGTCTCAGATCAGTGG<br>R: GTCAAGGGCCGGTTACAG     | 187                | 308387383c1             | 29 | <i>GUCY1B3</i> | F: CTGCTTACGTCTCAAGGGTCA<br>R: ATGTCACTTAGATACAGCCCTCT   | 123                | 221139770c3             |
| 12 | <i>PDE5A</i> | F: CGGCCTCTTAGACCCATTGTT<br>R: AGGGAATAGCGGTCAGCAGAT   | 239                | 61744429c2              | 30 | <i>GUCY2F</i>  | F: GAGGTTGCTGCGCGATTAG<br>R: CCAGGGTTGGTAGGTCCAATAA      | 173                | 134152693c2             |
| 13 | <i>PDE6A</i> | F: CATCGAACGACAGTTCCACAA<br>R: GGTCATGTCTAAGAGACCCACAG | 88                 | 170650673c3             | 31 | <i>GUCY2D</i>  | F: TCGTGCTGGTTCCGATCCAAAC<br>R: GTAGCCGGTGCCCTCACATAAT   | 133                | 169791019c3             |
| 14 | <i>PDE6B</i> | F: ACACCCTCAGCCGATCACT<br>R: ACATTTCTGTCAGCGGAAGCAT    | 103                | 223718033c2             | 32 | <i>ADCY2</i>   | F: GGGACCAGGTATCGTTCTTCC<br>R: GTGAGGACGCTGGCAATGAT      | 94                 | 115387101c2             |
| 15 | <i>PDE6C</i> | F: ATGGACAAGCAAAGTGGTATG<br>R: TGGTGATGAAGCCTTAGGAT    | 187                | 57364938c2              | 33 | <i>ADCY6</i>   | F: CTCCTGGTCCCTAAAGTGGAT<br>R: GGAGGCAGCTCATATAGCGG      | 124                | 168480141c1             |
| 16 | <i>PDE6D</i> | F: TTCAAAGGGCAATGCCTAGAAG<br>R: TTCCCAGTTAAGACGCTTGCT  | 134                | 56676309c3              | 34 | <i>ADCY8</i>   | F: CCTGCGGCACCAAAGTCTT<br>R: CGAGTTGCTAGGGGCACAG         | 110                | 168480145c1             |
| 17 | <i>PDE6G</i> | F: AAGGCTAGAGATGACCTCGG<br>R: GGGGTCCCTAAGTGAAAGC      | 246                | PMID: 20655036          | 35 | <i>ADCY10</i>  | F: GTGACGATTGTGTTTGTGAACC<br>R: GATGTGCATATAGGCATCCTGG   | 90                 | 268370068c3             |
| 18 | <i>PDE6H</i> | F: GCAGACTCGCCAATTCAAGAG<br>R: TCTGTTCTAGCCCCTCCATT    | 90                 | 291045288c1             |    |                |                                                          |                    |                         |
